# Supplementary material
Source: PubMed Central journal article supplement (PMC3674183)

Figure 1, online.

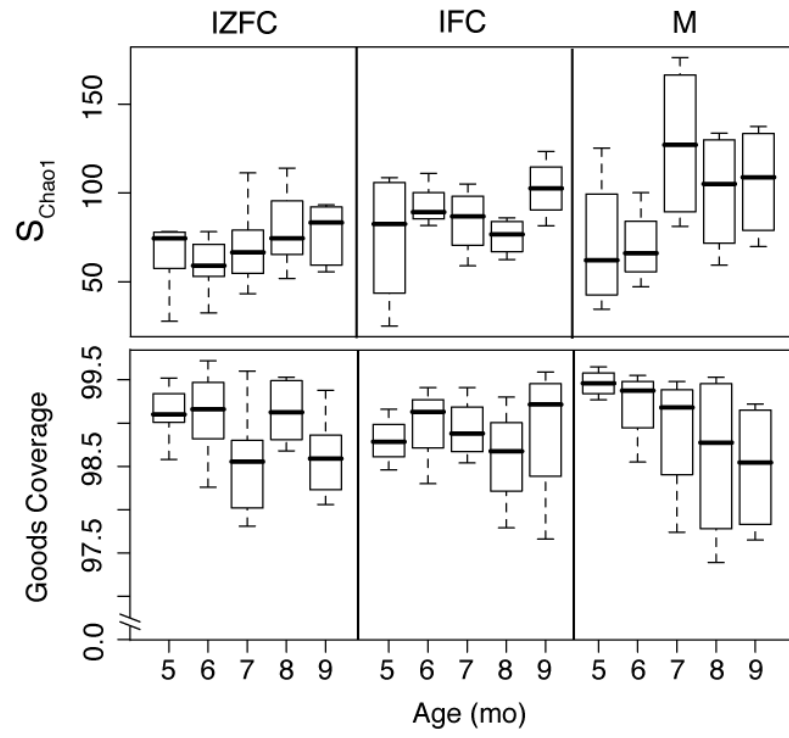

Figure 3, online.

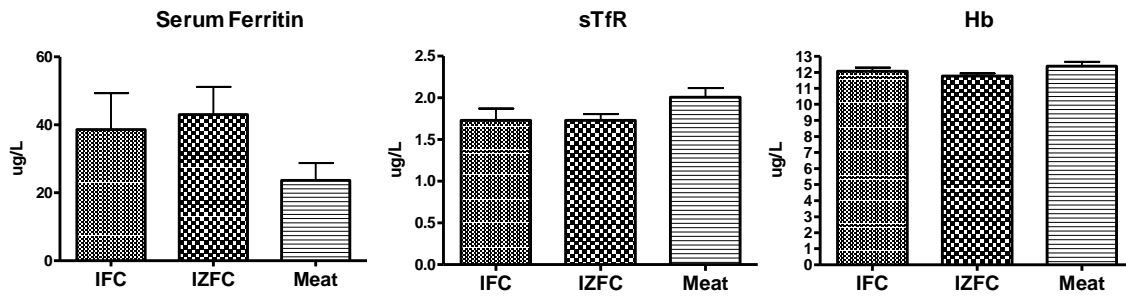

Figure 6, online.

\* < 0.10  
 \*\* < 0.05  
 \*\*\* < 0.01

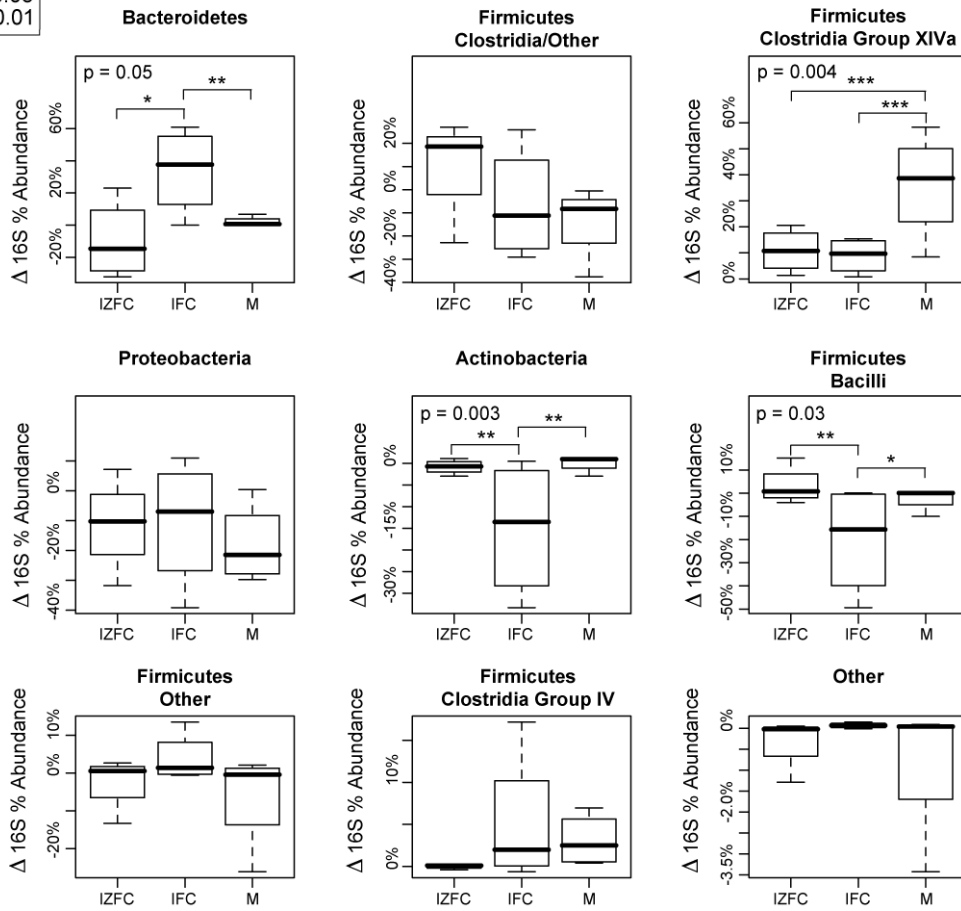

Figure 7, online.

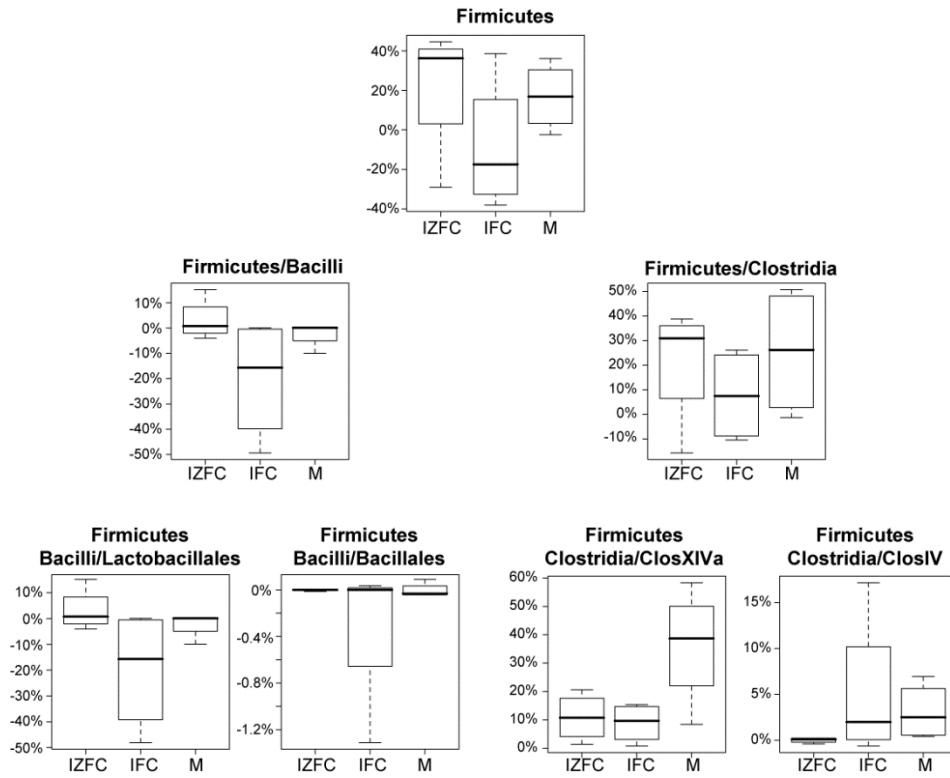

Figure 8, online.

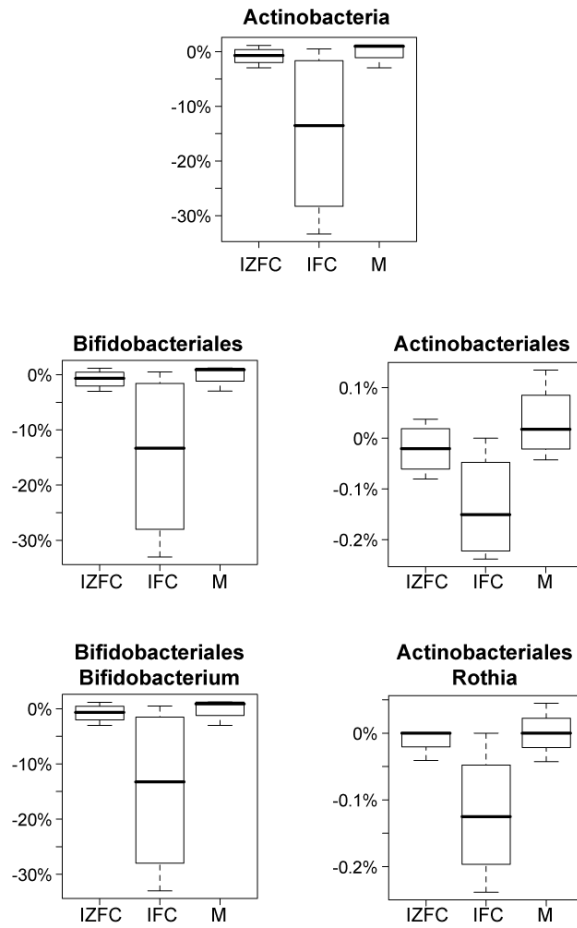

Supplement: NIHMS438031-supplement-01.pdf [file NIHMS438031-supplement-01.pdf]
